# Supplementary material for: Catalyst Influence on Undesired Side Reactions in the Polycondensation of Fully Bio-Based Polyester Itaconates
Source: MDPI journal article supplement (doi:10.3390/polym9120693), 2017-12-09
Supplement: s1 [file s1]

# Catalyst influence on undesired side-reactions in the polycondensation of fully bio-based polyester itaconates

Ina Schoon, Marcel Kluge, Steven Eschig, and Tobias Robert\*

Fraunhofer Institute for Wood Research – Wilhelm-Klauditz-Institut WKI, Bienroder Weg 54E, 38108 Braunschweig, Germany. E-mail: tobias.robert@wki.fraunhofer.de

\* Correspondence: tobias.robert@wki.fraunhofer.de; Tel.: +49-531-2155-357

Academic Editor: name

Received: date; Accepted: date; Published: date

## Supporting Information

### Size Exclusion Chromatography (SEC) Measurements

Determination of the molar mass distribution was performed by SEC measurements with tetrahydrofuran as eluent and with polystyrene-calibration in the range of 162 g/mol to 70,000 g/mol. Three columns SDV 1000A at 40°C, a variable UV-detector (here: 254 nm), a refractive index detector and the software (WinGPC Unity) were provided by Polymer Standard Service (Mainz, Germany). Samples of the polycondensation reaction of Itaconic acid with 1,3-propanediol in the presence of methanesulfonic acid (MSA) and zinc acetate ( $\text{Zn}(\text{OAc})_2$ ) were taken after 6.5, 7, and 7.5 hours. The molecular weight distribution for the polycondensation reaction with MSA is shown in figure S1, for  $\text{Zn}(\text{OAc})_2$  in figure S2. In addition, figure S3 shows the molecular weight distribution of both reaction at 7.5 h.

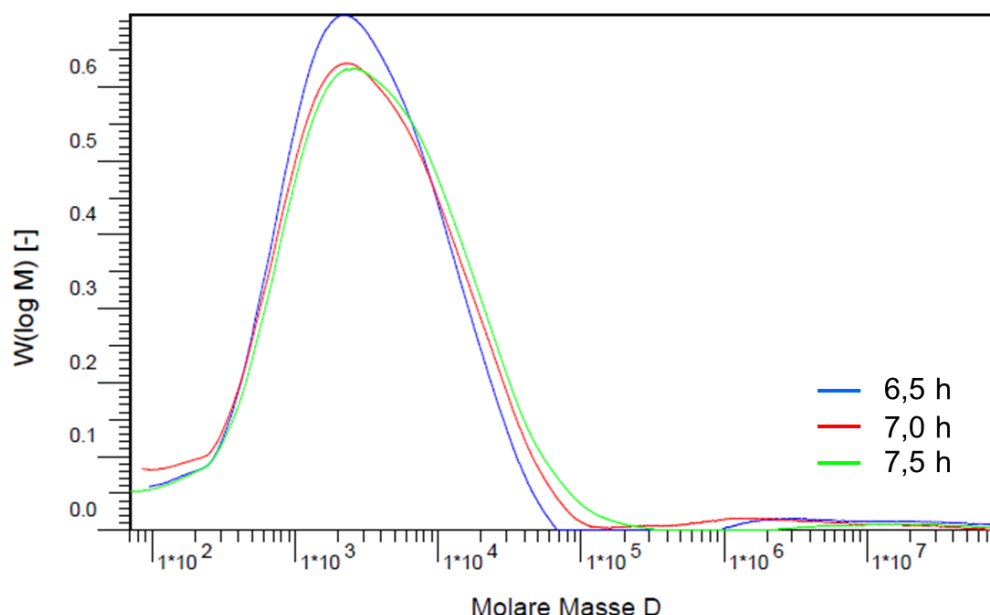

**Figure S1.** SEC traces of the polycondensation reaction of itaconic acid with 1,3-propanediol in the presence of MSA as catalyst.

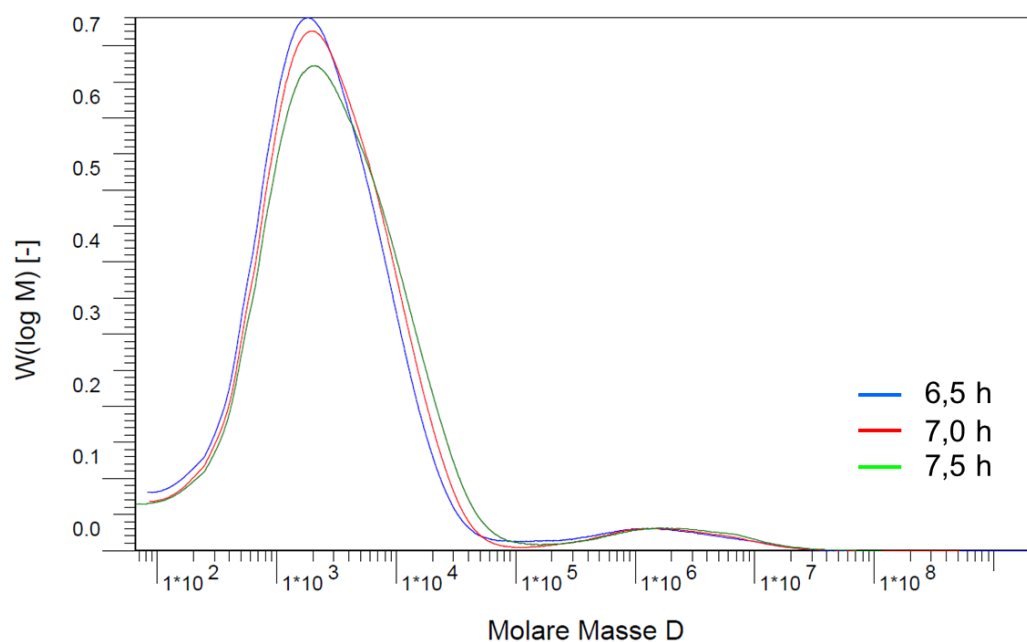

**Figure S2.** SEC traces of the polycondensation reaction of itaconic acid with 1,3-propanediol in the presence of  $\text{Zn}(\text{OAc})_2$  as catalyst.

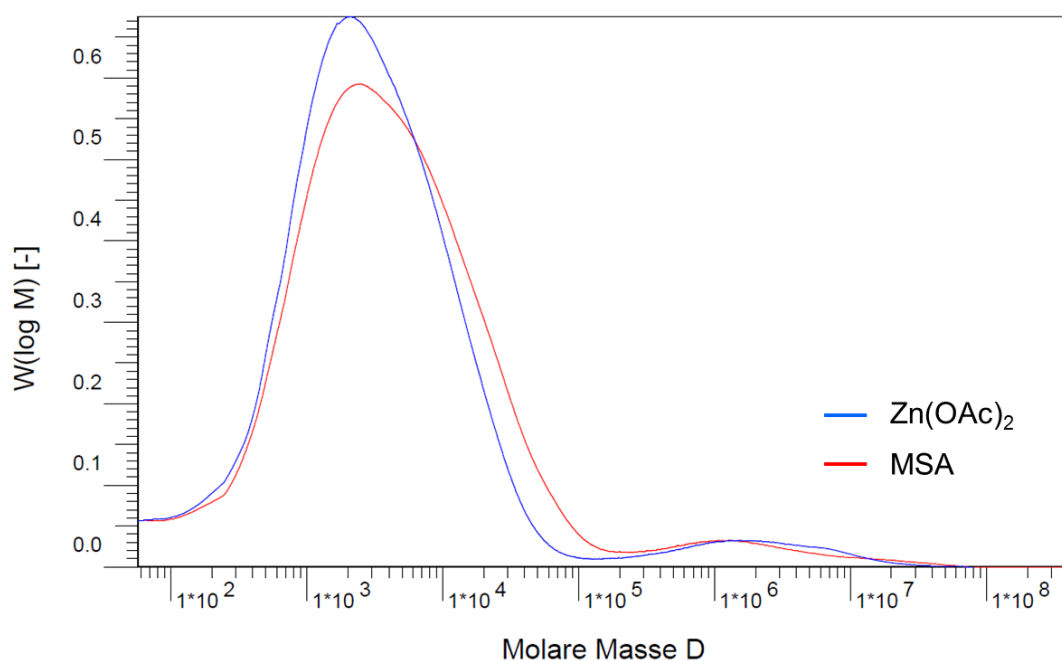

**Figure S3.** Comparison of the SEC traces of the polycondensation reaction of itaconic acid with 1,3-propanediol after 7.5 h in the presence of MSA and  $\text{Zn}(\text{OAc})_2$ .
